# Supplementary material for: Techno-Economic Assessment of Producer Gas from Heavy Oil and Biomass Co-Gasification Aiming Electricity Generation in Rankine Cycle
Source: MDPI journal article supplement (doi:10.3390/pr10112358), 2022-11-11
Supplement: s1 [file s1]

Archive with 1 entries (1 files):
- processes-2001801-supplementary.pdf
