# Supplementary material for: Techno-Economic Assessment of Producer Gas from Heavy Oil and Biomass Co-Gasification Aiming Electricity Generation in Rankine Cycle
Source: MDPI journal article supplement (doi:10.3390/pr10112358), 2022-11-11
Supplement: s1 [file s1 › processes-2001801-supplementary.pdf]

## Supplementary Material

The scheme of the power plant, composed by the gasifier, conditioning system (gas cooler), and Rankine cycle, is presented in Figure S1.

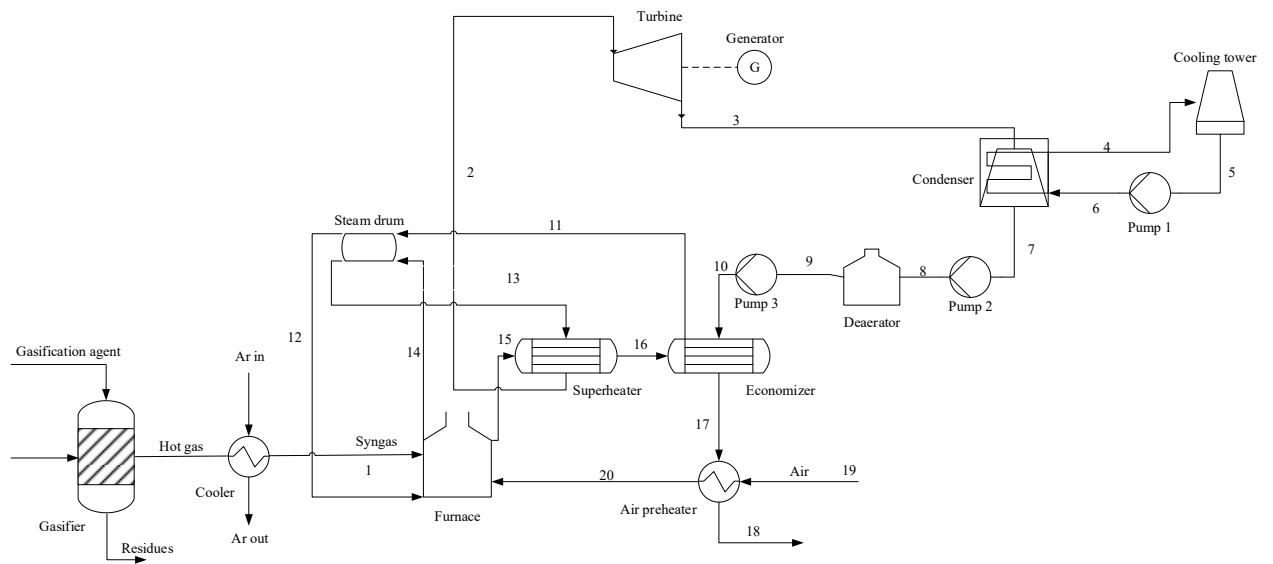

**Figure S1.** Power Plant Scheme

The main parameters used for the boiler components modeling, included in the Rankine cycle model, are presented in Table S1.

**Table S1.** Input parameters for the modeling of boiler components.

| <b>Boiler component</b> | <b>Parameter</b>                          | <b>Value</b> |
|-------------------------|-------------------------------------------|--------------|
| Economizer              | Desired temperature for the water leaving | 127 °C       |
| Air preheater           | Effectiveness                             | 80%          |
| Superheater             | Pressure drop fraction                    | 3%           |
| Furnace                 | Pressure drop fraction                    | 3%           |
| Furnace                 | Thermal losses                            | 5%           |
| Stream drum             | Desired drum blowdown fraction of steam   | 0%           |

For each input variable of the economic evaluation of the generation system studied, the types of probability distribution listed in Table S2 were used, with their respective parameters. The simulations were performed with 100,000 iterations and a confidence level of 95%.

**Table S2.** Input parameters for economic assessment

| <b>Item</b>                             | <b>Distribution</b> | <b>Parameter 1</b> | <b>Parameter 2</b> | <b>Parameter 3</b> |
|-----------------------------------------|---------------------|--------------------|--------------------|--------------------|
| O&M – Power cycle (\$/kWh)              | Triangular          | Min: 0.018         | Most prob: 0.019   | Max: 0.020         |
| O&M – Gasifier (%CAPEX)                 | Triangular          | Min: 3.60          | Most prob: 4.60    | Max: 5.70          |
| (BRL: R\$) to US\$ Exchange             | Weibull             | Location: 4.61     | Scale: 0.84        | Shape: 3.8452      |
| Electricity rate (R\$)                  | Logistic            | Avg.: 0.87628      | Scale: 0.19442     | -                  |
| Active power (kW) – Air case            | Triangular          | Min: 92.5          | Most prob: 141.0   | Max: 189.4         |
| Active power (kW) – O <sub>2</sub> case | Triangular          | Min: 129.9         | Most prob: 166.6   | Max: 203.4         |
